# Supplementary figures and images for: The Prognostic Value of LncRNA SLNCR1 in Cancers: A Meta-Analysis
Source: Hindawi journal article supplement (doi:10.1155/2021/3161714), 2021-10-25

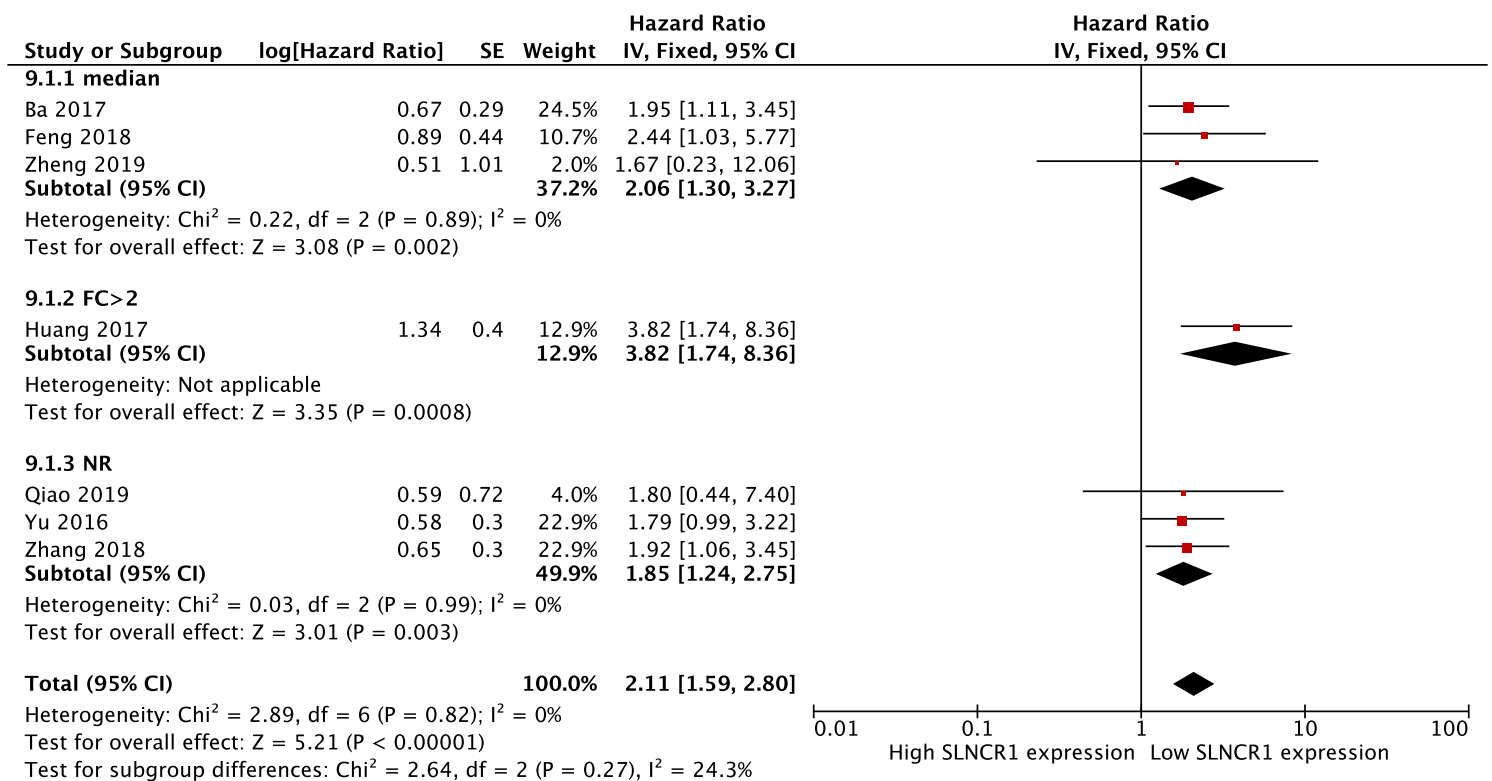

Supplement: f1 [file 3161714.f1.zip]

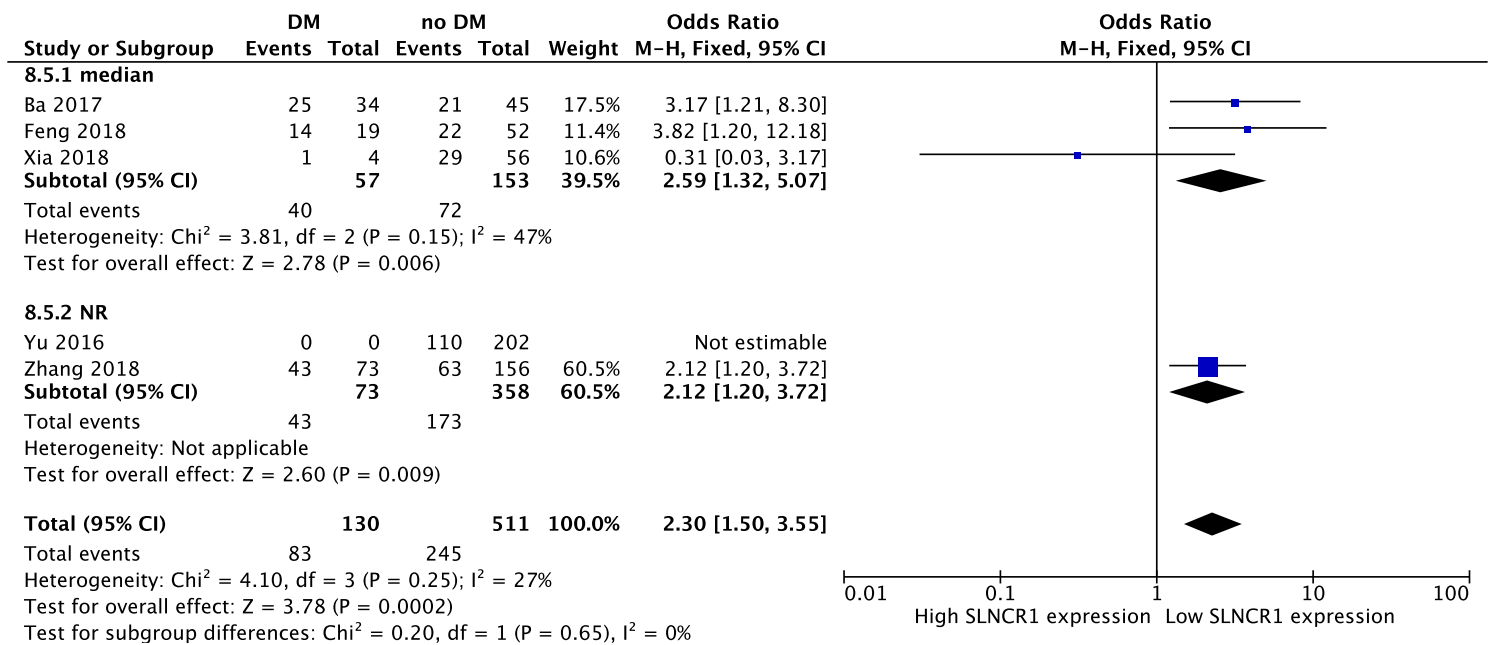

Supplement: f1 [file 3161714.f1.zip]

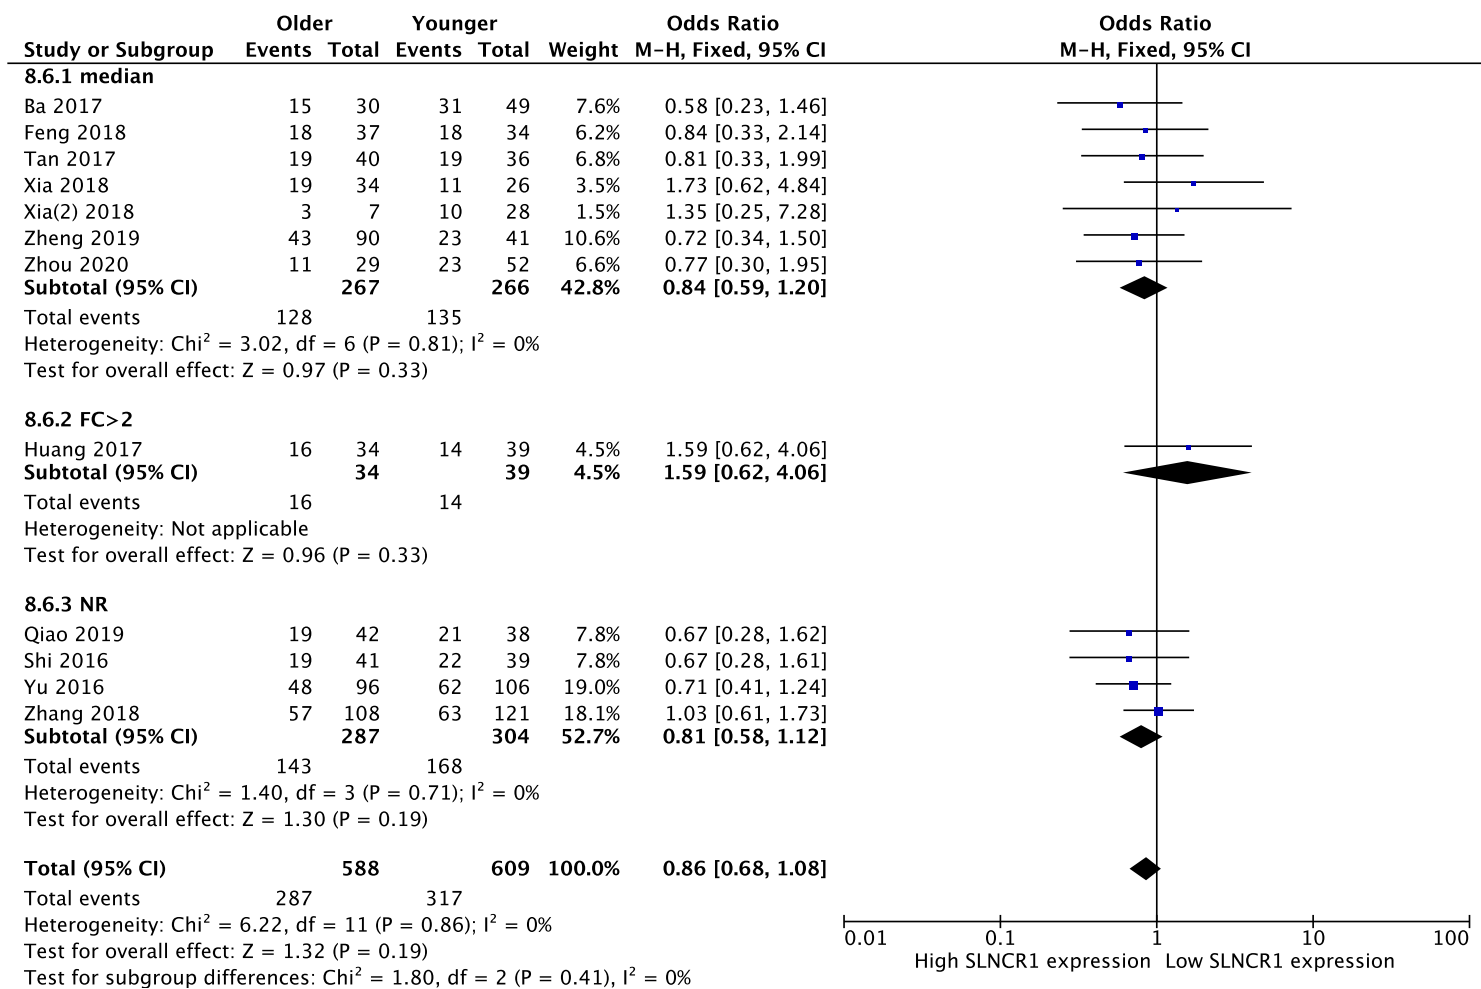

Supplement: f1 [file 3161714.f1.zip]

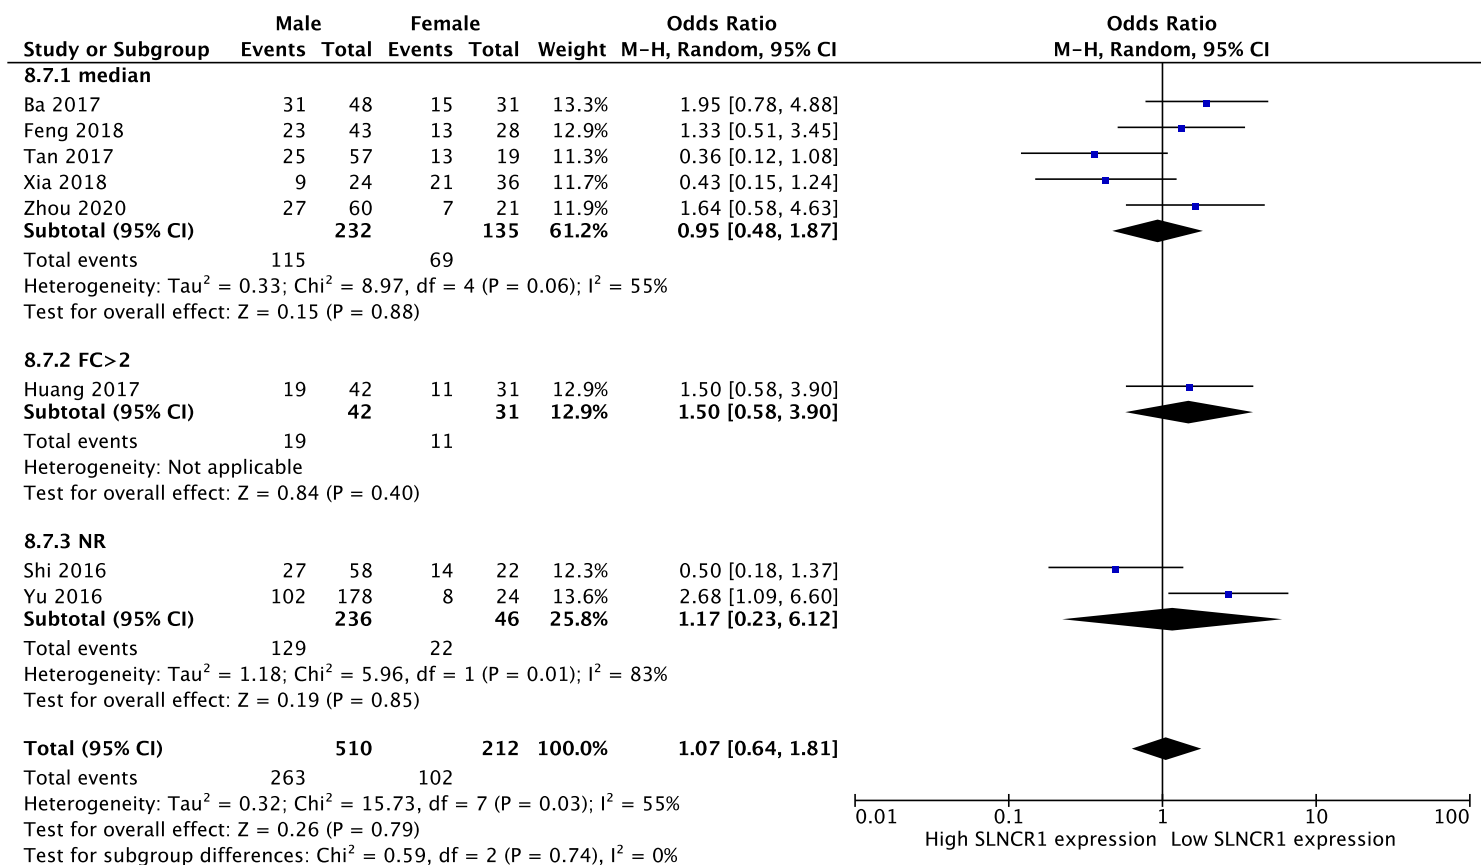

Supplement: f1 [file 3161714.f1.zip]

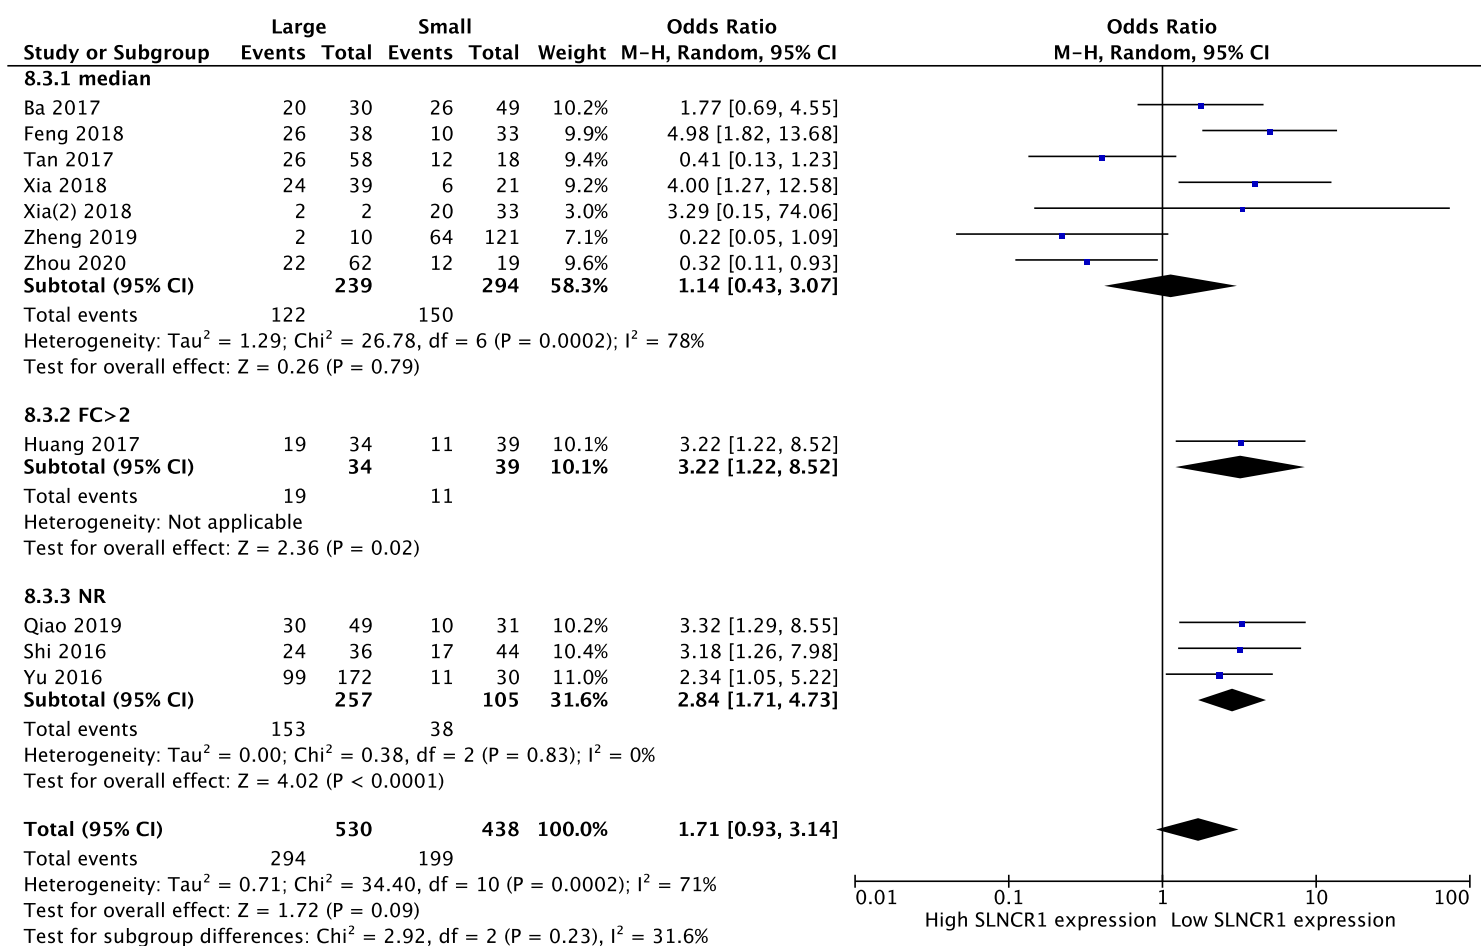

Supplement: f1 [file 3161714.f1.zip]

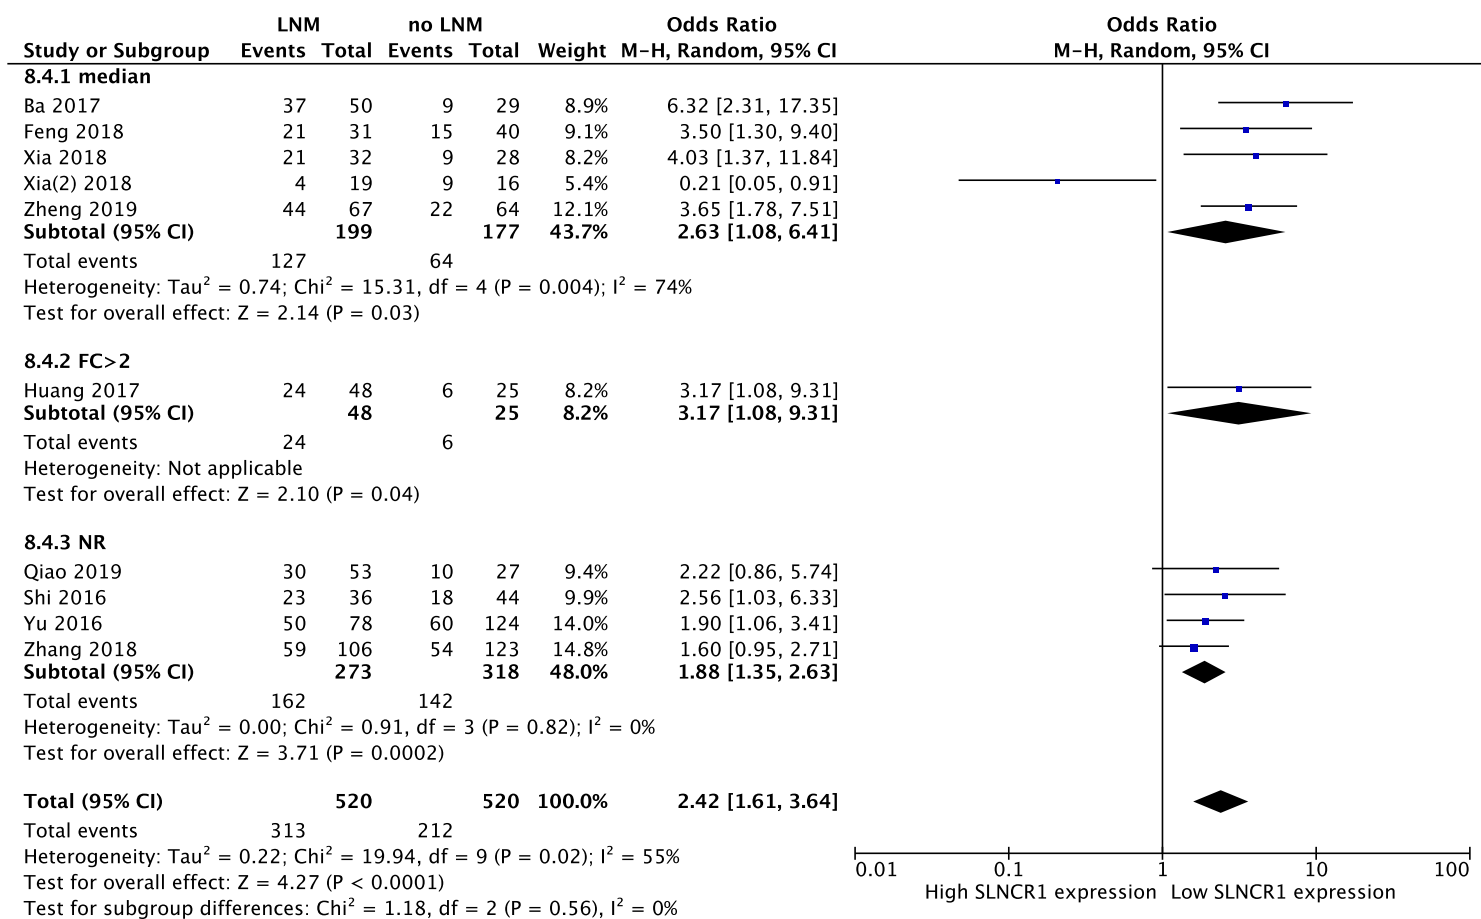

Supplement: f1 [file 3161714.f1.zip]

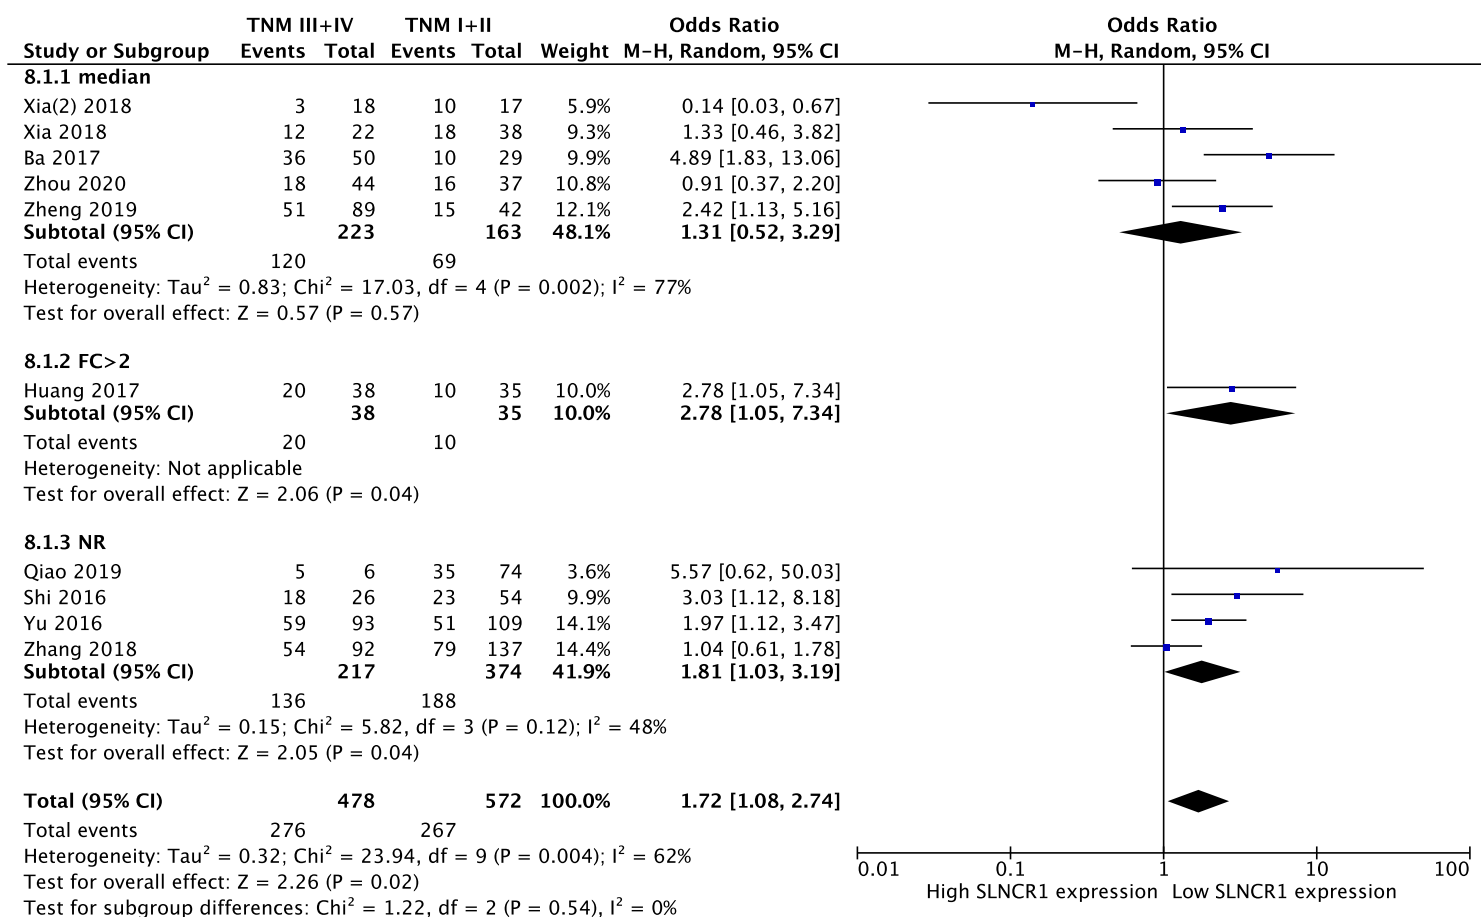

Supplement: f1 [file 3161714.f1.zip]
